# Supplementary material for: ATAD2 predicts poor outcomes in patients with ovarian cancer and is a marker of proliferation
Source: PubMed Central journal article supplement — Int J Oncol. 2019 Nov 14;56(1):219–31. doi: 10.3892/ijo.2019.4913 (PMC6910177; doi:10.3892/ijo.2019.4913), 2019-11-14
Supplement: Supplementary_Data.pdf [file Supplementary_Data.pdf]

Table S1. ATAD2 correlates significantly with classical proliferation makers in OC tissue and cell line samples from three independent datasets.

| Comparison      | TCGA OC tissue samples (n=307) |         |                      | GSE9891 OC tissue samples (n=285) |         |                      | OC cell line samples (n=47) |         |                      |
|-----------------|--------------------------------|---------|----------------------|-----------------------------------|---------|----------------------|-----------------------------|---------|----------------------|
|                 | Pearson's r                    | P-value | Significant (P<0.05) | Pearson's r                       | P-value | Significant (P<0.05) | Pearson's r                 | P-value | Significant (P<0.05) |
| ATAD2 vs. MKI67 | 0.3757                         | <0.0001 | Yes                  | 0.7071                            | <0.0001 | Yes                  | 0.3443                      | 0.0178  | Yes                  |
| ATAD2 vs. PCNA  | 0.268                          | <0.0001 | Yes                  | 0.5357                            | <0.0001 | Yes                  | 0.3386                      | 0.0199  | Yes                  |
| ATAD2 vs. MCM2  | 0.2449                         | <0.0001 | Yes                  | 0.613                             | <0.0001 | Yes                  | 0.4708                      | 0.0008  | Yes                  |
| ATAD2 vs. MCM3  | 0.2845                         | <0.0001 | Yes                  | 0.4964                            | <0.0001 | Yes                  | 0.3226                      | 0.027   | Yes                  |
| ATAD2 vs. MCM4  | 0.3932                         | <0.0001 | Yes                  | 0.5734                            | <0.0001 | Yes                  | 0.4783                      | 0.0007  | Yes                  |
| ATAD2 vs. MCM5  | 0.2452                         | <0.0001 | Yes                  | 0.397                             | <0.0001 | Yes                  | 0.2929                      | 0.0457  | Yes                  |
| ATAD2 vs. MCM6  | 0.3672                         | <0.0001 | Yes                  | 0.6611                            | <0.0001 | Yes                  | 0.5841                      | <0.0001 | Yes                  |
| ATAD2 vs. MCM7  | 0.2219                         | <0.0001 | Yes                  | 0.3841                            | <0.0001 | Yes                  | 0.3447                      | 0.0177  | Yes                  |
| ATAD2 vs. MCM8  | 0.1806                         | 0.0015  | Yes                  | 0.4005                            | <0.0001 | Yes                  | 0.0972                      | 0.5157  | No                   |
| ATAD2 vs. MCM9  | 0.1342                         | 0.0186  | Yes                  | -0.1016                           | 0.087   | No                   | 0.0531                      | 0.723   | No                   |
| ATAD2 vs. MCM10 | 0.2177                         | 0.0001  | Yes                  | 0.6487                            | <0.0001 | Yes                  | 0.5353                      | 0.0001  | Yes                  |

OC, ovarian cancer; ATAD2, ATPase family AAA domain-containing protein 2; MKI67, marker of proliferation Ki-67; PCNA, proliferation cell nuclear antigen; MCM, methylmalonyl-CoA mutase; TCGA, The Cancer Genome Atlas.
